# Supplementary material for: Influence of bidentate ligand donor types on the formation and stability in 2 + 1 fac-[MI(CO)3]+ (M = Re, 99mTc) complexes
Source: Royal Society of Chemistry journal article supplement (doi:10.1039/c6dt04282a), 2016-12-20
Supplement: c6dt04282a1.pdf [file c6dt04282a1.pdf]

# Influence of Bidentate Ligand Donor Types on the Formation and Stability in 2+1 *fac*-[M<sup>I</sup>(CO)<sub>3</sub>]<sup>+</sup> (M = Re, <sup>99m</sup>Tc) Complexes

Thomas R. Hayes,<sup>1</sup> Shalina C. Bottorff,<sup>1</sup> Winston S. Slocumb,<sup>1</sup> Charles L. Barnes,<sup>2</sup> Aurora E. Clark,<sup>1</sup> Paul D. Benny<sup>1\*</sup>

<sup>1</sup> Washington State University, Department of Chemistry, Pullman, WA 99164, USA.

<sup>2</sup> Department of Chemistry, University of Missouri, Columbia, MO 65211, USA.

## Table of Contents

|                                               |       |
|-----------------------------------------------|-------|
| Sample HPLC Chromatograms                     | 3-4   |
| Table of complex retention times              | 5     |
| Cartesian coordinates for computations        | 6-17  |
| Crystallographic tables for complex <b>1c</b> | 18-21 |
| Crystallographic tables for complex <b>2c</b> | 22-26 |
| Crystallographic tables for complex <b>3c</b> | 27-30 |
| Crystallographic tables for complex <b>5c</b> | 31-33 |
| Crystallographic tables for complex <b>6c</b> | 34-37 |

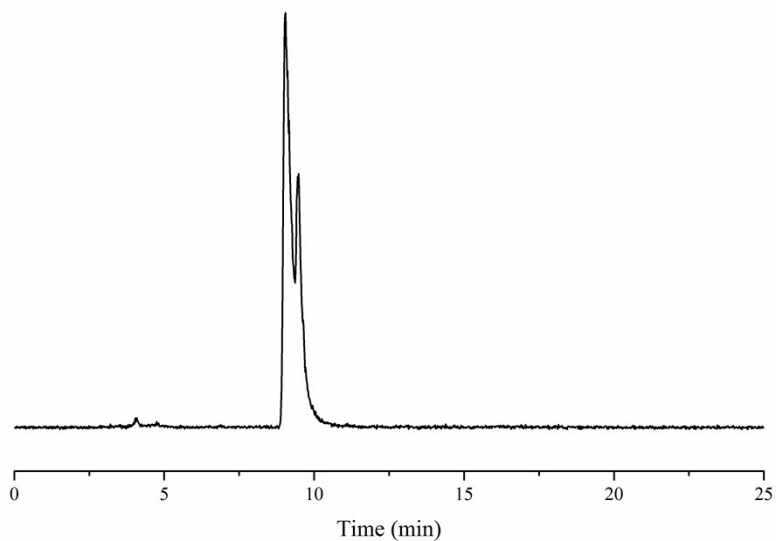

**Figure 1.** Reaction of  $fac-[^{99m}Tc^I(CO)_3(L_1)(OH_2)]^+$  (**1'**) (*left*) with pyridine to form  $fac-[^{99m}Tc^I(CO)_3(L_1)(py)]^+$  (**1a'**) (*right*).

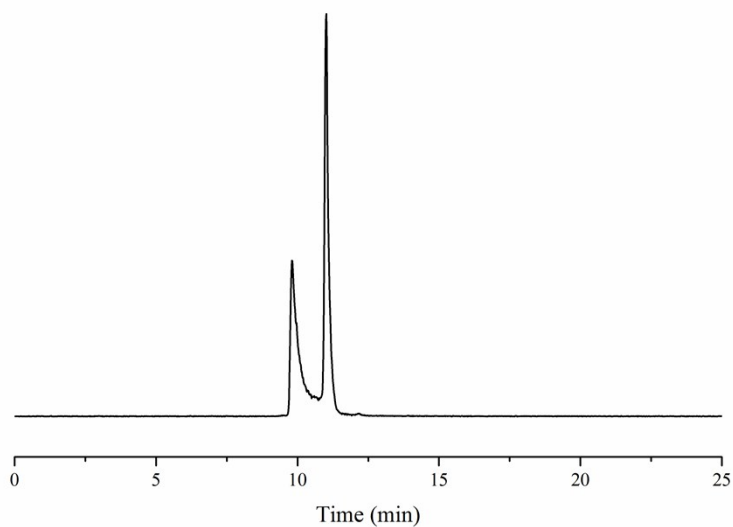

**Figure 2.** Radio-HPLC chromatogram of the reaction of  $fac-[^{99m}Tc^I(CO)_3(L_1)(OH_2)]^+$  (**1'**) with cysteine (1 mM) at 37 °C for 1 h. Retention time for  $fac-[^{99m}Tc^I(CO)_3(cysteine)]$  is 4.45 min.

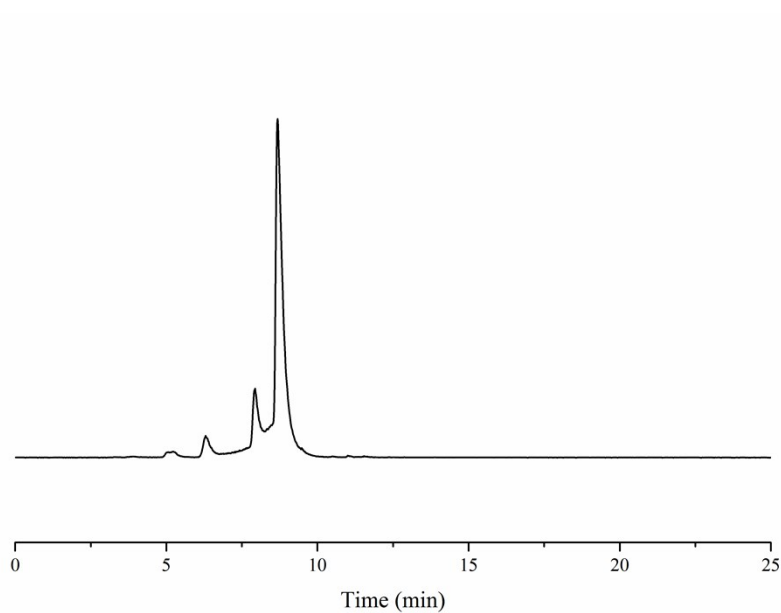

**Figure 3.** Radio-HPLC chromatogram of the reaction of bipy complex **1'** with histidine (1 mM) at 37 °C for 1 h. Retention time for *fac*-[<sup>99m</sup>TcI(CO)<sub>3</sub>(histidine)] is 5.00 min.

**Table 1.** Retention times of Re and <sup>99m</sup>Tc 2 + 1 complexes.

|                        | <b>Bidentate (L)</b> | <b>Complex</b>                                                      | <b>Re t<sub>R</sub> (min)</b> | <b>Tc t<sub>R</sub> (min)</b> |
|------------------------|----------------------|---------------------------------------------------------------------|-------------------------------|-------------------------------|
|                        |                      | [Tc(OH <sub>2</sub> ) <sub>3</sub> (CO) <sub>3</sub> ] <sup>+</sup> |                               | 4.10                          |
|                        |                      | [Tc(CO) <sub>3</sub> (cys)]                                         |                               | 4.45                          |
|                        |                      | [Tc(CO) <sub>3</sub> (his)]                                         |                               | 5.00                          |
| <b>Neutral Ligands</b> | <b>L<sub>1</sub></b> | <b>1a</b>                                                           | 8.11                          | 8.4                           |
|                        |                      | <b>1b</b>                                                           | 9.50                          | 9.72                          |
|                        |                      | <b>1c</b>                                                           | 10.86                         | 11.08                         |
|                        |                      | <b>1d</b>                                                           | 8.96                          | 9.15                          |
|                        | <b>L<sub>2</sub></b> | <b>2a</b>                                                           | 8.61                          | 8.72                          |
|                        |                      | <b>2b</b>                                                           | 9.87                          | 10.1                          |
|                        |                      | <b>2c</b>                                                           | 11.57                         | 11.83                         |
|                        |                      | <b>2d</b>                                                           | 9.17                          | 9.28                          |
|                        | <b>L<sub>3</sub></b> | <b>3a</b>                                                           | 13.12                         | 13.26                         |
|                        |                      | <b>3b</b>                                                           | 13.71                         | 13.75                         |
|                        |                      | <b>3c</b>                                                           | 14.31                         | 11.41                         |
|                        |                      | <b>3d</b>                                                           | 13.01                         | 13.25                         |
| <b>Anionic Ligands</b> | <b>L<sub>4</sub></b> | <b>4a</b>                                                           | 11.47                         | 11.88                         |
|                        |                      | <b>4b</b>                                                           | 13.07                         | 13.25                         |
|                        |                      | <b>4c</b>                                                           | 14.03                         | 14.55                         |
|                        |                      | <b>4d</b>                                                           | 10.51                         | 10.95                         |
|                        | <b>L<sub>5</sub></b> | <b>5a</b>                                                           | 12.02                         | 12.52                         |
|                        |                      | <b>5b</b>                                                           | 13.52                         | 13.60                         |
|                        |                      | <b>5c</b>                                                           | 14.32                         | 14.55                         |
|                        |                      | <b>5d</b>                                                           | 11.46                         | 11.90                         |
|                        | <b>L<sub>6</sub></b> | <b>6a</b>                                                           | 16.36                         | 17.07                         |
|                        |                      | <b>6b</b>                                                           | 17.12                         | 17.87                         |
|                        |                      | <b>6c</b>                                                           | 17.32                         | 18.2                          |
|                        |                      | <b>6d</b>                                                           | 15.31                         | 16.12                         |

**Table 2.** (U)B3LYP/aug-cc-PVDZ optimized structure of DMAP

---

|   |           |          |           |
|---|-----------|----------|-----------|
| N | -1.548054 | 1.005085 | -0.170635 |
| N | -1.970873 | 5.195842 | 0.335657  |
| C | -0.898566 | 1.892291 | -0.939080 |
| H | -0.243356 | 1.469035 | -1.709168 |
| C | -1.001033 | 3.276614 | -0.829462 |
| H | -0.431002 | 3.904704 | -1.512599 |
| C | -1.841738 | 3.834629 | 0.164205  |
| C | -2.539073 | 2.903780 | 0.972155  |
| H | -3.221671 | 3.228222 | 1.756314  |
| C | -2.350463 | 1.540339 | 0.761632  |
| H | -2.892080 | 0.826962 | 1.393475  |
| C | -1.341601 | 6.104944 | -0.605936 |
| H | -0.249313 | 5.953460 | -0.641593 |
| H | -1.523249 | 7.138525 | -0.284663 |
| H | -1.731970 | 5.990419 | -1.635879 |
| C | -2.948104 | 5.715515 | 1.275874  |
| H | -3.987058 | 5.443766 | 1.005666  |
| H | -2.876815 | 6.810409 | 1.300862  |
| H | -2.758648 | 5.345178 | 2.297769  |

**Table 3.** (U)B3LYP/aug-cc-pVDZ-PP/aug-cc-pVDZ optimized structure of **1c**.

---

|    |           |           |           |
|----|-----------|-----------|-----------|
| Re | 8.204861  | 9.282581  | 10.654620 |
| O  | 10.097820 | 10.710211 | 12.639968 |
| N  | 7.030084  | 8.413244  | 9.003336  |
| C  | 6.121032  | 7.426981  | 9.155305  |
| H  | 5.965679  | 7.071072  | 10.173803 |
| O  | 7.253287  | 7.356873  | 12.879296 |
| N  | 8.749595  | 10.440334 | 8.858663  |
| C  | 5.403794  | 6.887506  | 8.092190  |
| H  | 4.678130  | 6.095186  | 8.277914  |
| O  | 5.940656  | 11.256611 | 11.402492 |
| N  | 9.835493  | 7.855123  | 10.034685 |
| C  | 5.634988  | 7.384724  | 6.808819  |
| H  | 5.094879  | 6.987282  | 5.948056  |
| N  | 12.954315 | 5.146937  | 9.157666  |
| C  | 6.563018  | 8.410308  | 6.643927  |
| H  | 6.746003  | 8.818798  | 5.651596  |
| C  | 7.246728  | 8.916803  | 7.756238  |
| C  | 8.202558  | 10.043611 | 7.675818  |
| C  | 8.509502  | 10.704982 | 6.480157  |
| H  | 8.068298  | 10.377634 | 5.540343  |
| C  | 9.376293  | 11.795274 | 6.494041  |
| H  | 9.617398  | 12.318793 | 5.567550  |
| C  | 9.917229  | 12.208299 | 7.712448  |
| H  | 10.589525 | 13.064005 | 7.780553  |
| C  | 9.579939  | 11.504608 | 8.864287  |
| H  | 9.975831  | 11.798546 | 9.836405  |
| C  | 11.110725 | 8.264459  | 9.818800  |
| H  | 11.294134 | 9.336228  | 9.901967  |
| C  | 12.163322 | 7.421627  | 9.522943  |
| H  | 13.148233 | 7.860285  | 9.378816  |
| C  | 11.951184 | 6.017363  | 9.430941  |
| C  | 10.611398 | 5.592098  | 9.653535  |
| H  | 10.332840 | 4.541280  | 9.615727  |
| C  | 9.628808  | 6.517459  | 9.943501  |
| H  | 8.610720  | 6.172809  | 10.127773 |
| C  | 14.318054 | 5.633232  | 8.964628  |
| H  | 14.379908 | 6.333875  | 8.114969  |
| H  | 14.974267 | 4.782355  | 8.750658  |
| H  | 14.699173 | 6.142112  | 9.866345  |
| C  | 12.688184 | 3.711813  | 9.101779  |
| H  | 12.314018 | 3.330302  | 10.067053 |
| H  | 13.618811 | 3.184437  | 8.864718  |
| H  | 11.949545 | 3.468772  | 8.319481  |
| C  | 9.377526  | 10.161767 | 11.918470 |

|   |          |           |           |
|---|----------|-----------|-----------|
| C | 7.622885 | 8.093270  | 12.066098 |
| C | 6.786912 | 10.519163 | 11.127933 |



**Table 4.** (U)B3LYP/aug-cc-pVDZ-PP/aug-cc-pVDZ optimized structure of **2c**.

---

|    |           |           |           |
|----|-----------|-----------|-----------|
| Re | 9.331114  | 2.945660  | 5.594564  |
| O  | 9.205734  | 1.316905  | 2.970575  |
| O  | 6.826445  | 4.564763  | 4.785284  |
| O  | 11.133270 | 5.036615  | 4.198695  |
| N  | 9.652590  | 3.846230  | 7.559488  |
| N  | 10.746506 | 4.036717  | 9.478474  |
| N  | 11.082350 | 1.895176  | 6.494667  |
| N  | 8.067873  | 1.424951  | 6.679894  |
| N  | 5.477349  | -1.393153 | 8.462761  |
| C  | 9.097289  | 4.879860  | 8.266864  |
| H  | 8.273993  | 5.470619  | 7.877314  |
| C  | 9.767165  | 5.005773  | 9.460001  |
| H  | 9.636027  | 5.698417  | 10.285199 |
| C  | 10.652762 | 3.343156  | 8.302102  |
| C  | 11.463660 | 2.255882  | 7.756817  |
| C  | 12.542211 | 1.634003  | 8.397557  |
| H  | 12.825490 | 1.927546  | 9.404906  |
| C  | 13.275966 | 0.630236  | 7.753660  |
| C  | 12.877050 | 0.287728  | 6.453172  |
| H  | 13.406941 | -0.478441 | 5.884972  |
| C  | 11.792892 | 0.932893  | 5.872687  |
| H  | 11.474162 | 0.683626  | 4.860260  |
| C  | 7.090019  | 1.788506  | 7.546046  |
| H  | 6.997051  | 2.856471  | 7.745457  |
| C  | 6.222473  | 0.906698  | 8.160366  |
| H  | 5.466163  | 1.311368  | 8.829397  |
| C  | 6.317181  | -0.488515 | 7.898649  |
| C  | 7.351398  | -0.866826 | 6.997904  |
| H  | 7.514231  | -1.905880 | 6.720131  |
| C  | 8.166825  | 0.094979  | 6.434699  |
| H  | 8.942129  | -0.208979 | 5.730538  |
| C  | 4.410158  | -0.948857 | 9.354704  |
| H  | 4.813811  | -0.426476 | 10.238504 |
| H  | 3.849270  | -1.822606 | 9.704775  |
| H  | 3.705796  | -0.272368 | 8.841034  |
| C  | 5.597579  | -2.811205 | 8.135981  |
| H  | 5.439686  | -2.995576 | 7.059547  |
| H  | 4.838708  | -3.372349 | 8.692585  |
| H  | 6.588194  | -3.207438 | 8.416182  |
| C  | 9.232527  | 1.945502  | 3.944146  |
| C  | 7.766295  | 3.949777  | 5.064981  |
| C  | 10.455367 | 4.255178  | 4.715868  |
| C  | 11.690487 | 3.859616  | 10.580499 |
| H  | 11.589002 | 2.858980  | 11.023552 |

|   |           |           |           |
|---|-----------|-----------|-----------|
| H | 12.722559 | 4.015057  | 10.236230 |
| H | 11.462276 | 4.607262  | 11.349002 |
| C | 14.447422 | -0.042002 | 8.413953  |
| H | 15.378011 | 0.182658  | 7.866913  |
| H | 14.576066 | 0.283671  | 9.455271  |
| H | 14.326663 | -1.136923 | 8.404335  |

**Table 5.** (U)B3LYP/aug-cc-pVDZ-PP/aug-cc-pVDZ optimized structure of **3c**

---

|    |          |          |          |
|----|----------|----------|----------|
| Re | -1.45845 | -1.20178 | -0.57158 |
| O  | -4.50659 | -1.53178 | -0.18661 |
| N  | 0.70347  | -0.92873 | -0.47893 |
| C  | 1.29125  | -1.03387 | 0.75475  |
| O  | -1.82213 | -0.7652  | -3.61076 |
| N  | 1.60593  | -0.70435 | -1.39949 |
| C  | 2.65215  | -0.86812 | 0.56301  |
| H  | 3.50197  | -0.86901 | 1.23662  |
| O  | -1.19404 | -4.24693 | -1.05567 |
| N  | 2.78543  | -0.6688  | -0.77223 |
| C  | 0.42993  | -1.3013  | 1.9004   |
| N  | -0.89224 | -1.42765 | 1.5873   |
| C  | 0.89981  | -1.44512 | 3.20902  |
| H  | 1.9645   | -1.33665 | 3.41899  |
| N  | -1.57066 | 1.01206  | -0.18555 |
| C  | -0.0039  | -1.73396 | 4.22928  |
| H  | 0.34265  | -1.85369 | 5.25706  |
| N  | -2.0217  | 5.18213  | 0.28834  |
| C  | -1.35614 | -1.87508 | 3.90915  |
| H  | -2.10076 | -2.11109 | 4.66981  |
| C  | -1.75462 | -1.71505 | 2.58477  |
| H  | -2.8     | -1.82889 | 2.2968   |
| C  | 4.02617  | -0.51544 | -1.57313 |
| H  | 3.72737  | 0.06495  | -2.45567 |
| H  | 4.32186  | -1.51971 | -1.91027 |
| C  | 5.13641  | 0.14873  | -0.79691 |
| C  | 6.18495  | -0.61748 | -0.2675  |
| H  | 6.20404  | -1.69882 | -0.4284  |
| C  | 7.21704  | -0.00408 | 0.44964  |
| H  | 8.0336   | -0.60821 | 0.84988  |
| C  | 7.20709  | 1.37972  | 0.64222  |
| H  | 8.01602  | 1.86029  | 1.19617  |
| C  | 6.16602  | 2.15133  | 0.11339  |
| H  | 6.1637   | 3.23448  | 0.25121  |
| C  | 5.13664  | 1.53967  | -0.6038  |
| H  | 4.33318  | 2.14844  | -1.0274  |
| C  | -0.90511 | 1.90264  | -0.96304 |
| H  | -0.25738 | 1.47907  | -1.73197 |
| C  | -1.01293 | 3.27428  | -0.84265 |
| H  | -0.44286 | 3.8967   | -1.52896 |
| C  | -1.8671  | 3.84151  | 0.14381  |
| C  | -2.55291 | 2.90305  | 0.96416  |
| H  | -3.23503 | 3.22245  | 1.74898  |
| C  | -2.37787 | 1.5482   | 0.76256  |

|   |          |          |          |
|---|----------|----------|----------|
| H | -2.92461 | 0.84045  | 1.38681  |
| C | -1.32161 | 6.10297  | -0.60237 |
| H | -0.22717 | 5.99066  | -0.5206  |
| H | -1.57791 | 7.132    | -0.32669 |
| H | -1.61041 | 5.94824  | -1.65603 |
| C | -2.93256 | 5.71233  | 1.29901  |
| H | -3.97096 | 5.38267  | 1.12388  |
| H | -2.9117  | 6.80716  | 1.26054  |
| H | -2.63418 | 5.40113  | 2.31435  |
| C | -3.3671  | -1.41121 | -0.35782 |
| C | -1.70228 | -0.93318 | -2.47392 |
| C | -1.297   | -3.10903 | -0.87875 |

**Table 6.** (U)B3LYP/aug-cc-pVDZ-PP/aug-cc-pVDZ optimized structure of **4c**.

---

|    |           |           |          |
|----|-----------|-----------|----------|
| Re | 3.913803  | 8.909191  | 2.655596 |
| O  | 3.876834  | 9.979374  | 4.505198 |
| O  | 2.822117  | 10.254158 | 6.482593 |
| O  | 3.715070  | 6.998561  | 0.248582 |
| O  | 2.349203  | 11.043856 | 1.064067 |
| O  | 6.575671  | 10.073804 | 1.597997 |
| N  | 2.079538  | 8.201926  | 3.684336 |
| N  | 5.018994  | 7.390744  | 3.916731 |
| N  | 7.233107  | 4.629392  | 6.217089 |
| C  | 2.927722  | 9.759648  | 5.368969 |
| C  | 1.876483  | 8.764959  | 4.896580 |
| C  | 0.764470  | 8.458634  | 5.679953 |
| H  | 0.676100  | 8.955882  | 6.645992 |
| C  | -0.173011 | 7.546516  | 5.198945 |
| H  | -1.056421 | 7.290612  | 5.787840 |
| C  | 0.037510  | 6.967056  | 3.943689 |
| H  | -0.668351 | 6.250818  | 3.520865 |
| C  | 1.173140  | 7.318819  | 3.218826 |
| H  | 1.373559  | 6.897219  | 2.232689 |
| C  | 3.818917  | 7.748864  | 1.139111 |
| C  | 2.938999  | 10.245189 | 1.664330 |
| C  | 5.574673  | 9.634497  | 1.985384 |
| C  | 5.748759  | 7.776906  | 4.990838 |
| H  | 5.713360  | 8.841423  | 5.224617 |
| C  | 6.491125  | 6.908996  | 5.772103 |
| H  | 7.045066  | 7.323568  | 6.611724 |
| C  | 6.516965  | 5.522577  | 5.472885 |
| C  | 5.750563  | 5.125900  | 4.345749 |
| H  | 5.703620  | 4.088529  | 4.021076 |
| C  | 5.044501  | 6.070872  | 3.622667 |
| H  | 4.470439  | 5.761796  | 2.748221 |
| C  | 8.018489  | 5.089988  | 7.353781 |
| H  | 8.802437  | 5.805339  | 7.048355 |
| H  | 8.508097  | 4.228999  | 7.824161 |
| H  | 7.385710  | 5.579944  | 8.114003 |
| C  | 7.244612  | 3.219562  | 5.855266 |
| H  | 6.230746  | 2.783015  | 5.881696 |
| H  | 7.867759  | 2.670024  | 6.570773 |
| H  | 7.660564  | 3.057642  | 4.844925 |

**Table 7.** (U)B3LYP/aug-cc-pVDZ-PP/aug-cc-pVDZ optimized structure of **5c**.

---

|    |           |           |          |
|----|-----------|-----------|----------|
| Re | 4.675059  | 2.587188  | 4.499148 |
| O  | 2.934184  | 2.325209  | 3.231109 |
| N  | 3.026396  | 2.074355  | 5.872139 |
| C  | 2.809178  | 1.849904  | 7.208640 |
| H  | 3.601681  | 1.939983  | 7.945644 |
| O  | 0.714663  | 1.900699  | 3.154128 |
| N  | 0.904167  | 1.518550  | 6.137244 |
| C  | 1.488876  | 1.502686  | 7.385886 |
| H  | 0.927129  | 1.244744  | 8.278344 |
| O  | 6.835339  | 3.106850  | 6.628202 |
| N  | 3.874646  | 4.696823  | 4.614845 |
| C  | 1.865912  | 1.867659  | 5.243465 |
| O  | 6.634091  | 3.368989  | 2.241011 |
| N  | 2.499843  | 8.686961  | 4.696003 |
| C  | 1.781471  | 2.030441  | 3.748758 |
| O  | 5.613774  | -0.346459 | 4.291302 |
| C  | -0.490385 | 1.198318  | 5.834619 |
| H  | -0.629271 | 1.324821  | 4.754468 |
| H  | -1.155171 | 1.878185  | 6.387902 |
| H  | -0.705178 | 0.160054  | 6.128165 |
| C  | 3.206174  | 5.243994  | 3.572092 |
| H  | 3.037803  | 4.582417  | 2.721781 |
| C  | 2.738067  | 6.546304  | 3.552690 |
| H  | 2.216213  | 6.889538  | 2.661843 |
| C  | 2.942806  | 7.394820  | 4.670814 |
| C  | 3.640355  | 6.812717  | 5.761219 |
| H  | 3.856209  | 7.373500  | 6.668267 |
| C  | 4.073276  | 5.500492  | 5.683477 |
| H  | 4.620899  | 5.062185  | 6.518774 |
| C  | 1.810963  | 9.244970  | 3.540945 |
| H  | 2.450641  | 9.244318  | 2.640546 |
| H  | 1.529296  | 10.282354 | 3.757474 |
| H  | 0.889900  | 8.683794  | 3.305885 |
| C  | 2.759341  | 9.525846  | 5.856593 |
| H  | 2.306036  | 9.107235  | 6.772263 |
| H  | 2.323926  | 10.517925 | 5.687573 |
| H  | 3.841349  | 9.653768  | 6.038727 |
| C  | 6.040456  | 2.904254  | 5.796716 |
| C  | 5.905142  | 3.072062  | 3.094454 |
| C  | 5.260493  | 0.756595  | 4.367066 |

**Table 8.** (U)B3LYP/aug-cc-pVDZ-PP/aug-cc-pVDZ optimized structure of **6c**.

---

|    |         |          |          |
|----|---------|----------|----------|
| Re | 7.58655 | 1.53506  | 1.84688  |
| O  | 8.3847  | 2.97079  | 3.25714  |
| N  | 6.73623 | 0.96971  | 3.79456  |
| C  | 7.15778 | 1.75702  | 4.82717  |
| O  | 8.42797 | 3.6673   | 5.41429  |
| N  | 5.86548 | 0.17627  | 5.55143  |
| C  | 6.59066 | 1.24669  | 5.9739   |
| H  | 6.65282 | 1.55918  | 7.01046  |
| O  | 6.08257 | -0.51694 | 0.11052  |
| N  | 5.95228 | 0.01382  | 4.2213   |
| C  | 8.07416 | 2.90973  | 4.52338  |
| O  | 8.9362  | 2.74555  | -0.65409 |
| N  | 5.90457 | 3.03908  | 1.7427   |
| C  | 5.03376 | -0.7441  | 6.33703  |
| H  | 5.64294 | -1.12073 | 7.17071  |
| H  | 4.82228 | -1.58302 | 5.66047  |
| O  | 9.92699 | -0.45906 | 2.13286  |
| N  | 2.84925 | 5.92724  | 1.37301  |
| C  | 3.75926 | -0.10453 | 6.84878  |
| C  | 2.7811  | 0.34531  | 5.94805  |
| H  | 2.94636 | 0.2393   | 4.87285  |
| C  | 1.60305 | 0.92549  | 6.42008  |
| H  | 0.84661 | 1.27039  | 5.71158  |
| C  | 1.38678 | 1.05965  | 7.79653  |
| H  | 0.46302 | 1.51168  | 8.16427  |
| C  | 2.35451 | 0.61167  | 8.69795  |
| H  | 2.1923  | 0.71216  | 9.77327  |
| C  | 3.53699 | 0.0334   | 8.22437  |
| H  | 4.29131 | -0.31748 | 8.93396  |
| C  | 6.13554 | 4.3555   | 1.96156  |
| H  | 7.15579 | 4.61127  | 2.24977  |
| C  | 5.16625 | 5.33719  | 1.85167  |
| H  | 5.45747 | 6.36753  | 2.04484  |
| C  | 3.83748 | 4.9917   | 1.4957   |
| C  | 3.60283 | 3.60968  | 1.27328  |
| H  | 2.62159 | 3.23322  | 0.99156  |
| C  | 4.63975 | 2.70231  | 1.40372  |
| H  | 4.45799 | 1.64266  | 1.21961  |
| C  | 3.14697 | 7.33603  | 1.58971  |
| H  | 3.52354 | 7.52004  | 2.61086  |
| H  | 2.2294  | 7.92152  | 1.45654  |
| H  | 3.90026 | 7.71202  | 0.87481  |
| C  | 1.50839 | 5.52564  | 0.97538  |
| H  | 1.49939 | 5.05026  | -0.02173 |

|   |         |         |         |
|---|---------|---------|---------|
| H | 0.86473 | 6.41245 | 0.93442 |
| H | 1.06406 | 4.81621 | 1.6956  |
| C | 6.67314 | 0.26101 | 0.74804 |
| C | 8.4292  | 2.2826  | 0.2814  |
| C | 9.04873 | 0.29173 | 2.02601 |



**Table 9.** Crystal data and structure refinement for **1c**.

|                                   |                                                                                         |                 |
|-----------------------------------|-----------------------------------------------------------------------------------------|-----------------|
| Identification code               | <b>1c</b>                                                                               |                 |
| Empirical formula                 | C <sub>21.50</sub> H <sub>20</sub> F <sub>3</sub> N <sub>4</sub> O <sub>6.50</sub> Re S |                 |
| Formula weight                    | 713.67                                                                                  |                 |
| Temperature                       | 100(2) K                                                                                |                 |
| Wavelength                        | 0.71073 Å                                                                               |                 |
| Crystal system                    | Monoclinic                                                                              |                 |
| Space group                       | C 2/c                                                                                   |                 |
| Unit cell dimensions              | a = 25.988(6) Å                                                                         | a = 90°.        |
|                                   | b = 12.548(3) Å                                                                         | b = 95.685(2)°. |
|                                   | c = 14.946(3) Å                                                                         | g = 90°.        |
| Volume                            | 4850.0(19) Å <sup>3</sup>                                                               |                 |
| Z                                 | 8                                                                                       |                 |
| Density (calculated)              | 1.955 Mg/m <sup>3</sup>                                                                 |                 |
| Absorption coefficient            | 5.169 mm <sup>-1</sup>                                                                  |                 |
| F(000)                            | 2776                                                                                    |                 |
| Crystal size                      | 0.500 x 0.350 x 0.250 mm <sup>3</sup>                                                   |                 |
| Theta range for data collection   | 1.804 to 27.522°.                                                                       |                 |
| Index ranges                      | -33 ≤ h ≤ 33, -16 ≤ k ≤ 16, -19 ≤ l ≤ 19                                                |                 |
| Reflections collected             | 26618                                                                                   |                 |
| Independent reflections           | 5537 [R(int) = 0.0357]                                                                  |                 |
| Completeness to theta = 25.242°   | 100.0 %                                                                                 |                 |
| Absorption correction             | Semi-empirical from equivalents                                                         |                 |
| Max. and min. transmission        | 0.36 and 0.21                                                                           |                 |
| Refinement method                 | Full-matrix least-squares on F <sup>2</sup>                                             |                 |
| Data / restraints / parameters    | 5537 / 0 / 341                                                                          |                 |
| Goodness-of-fit on F <sup>2</sup> | 1.070                                                                                   |                 |
| Final R indices [I > 2σ(I)]       | R1 = 0.0289, wR2 = 0.0643                                                               |                 |
| R indices (all data)              | R1 = 0.0428, wR2 = 0.0752                                                               |                 |
| Extinction coefficient            | n/a                                                                                     |                 |
| Largest diff. peak and hole       | 1.409 and -2.319 e.Å <sup>-3</sup>                                                      |                 |

**Table 10.** Bond lengths [Å] and angles [°] for **1c**.

|             |          |                   |            |
|-------------|----------|-------------------|------------|
| Re(1)-C(18) | 1.912(5) | C(6)-C(7)         | 1.392(6)   |
| Re(1)-C(19) | 1.919(4) | C(7)-C(8)         | 1.383(7)   |
| Re(1)-C(20) | 1.939(5) | C(7)-H(7)         | 0.9500     |
| Re(1)-N(2)  | 2.164(4) | C(8)-C(9)         | 1.375(8)   |
| Re(1)-N(1)  | 2.171(4) | C(8)-H(8)         | 0.9500     |
| Re(1)-N(3)  | 2.206(3) | C(9)-C(10)        | 1.379(7)   |
| S(1)-O(6)   | 1.437(4) | C(9)-H(9)         | 0.9500     |
| S(1)-O(4)   | 1.439(4) | C(10)-H(10)       | 0.9500     |
| S(1)-O(5)   | 1.450(4) | C(11)-C(12)       | 1.367(6)   |
| S(1)-C(21)  | 1.825(7) | C(11)-H(11)       | 0.9500     |
| F(1)-C(21)  | 1.315(7) | C(12)-C(13)       | 1.414(6)   |
| O(1)-C(18)  | 1.158(6) | C(12)-H(12)       | 0.9500     |
| N(1)-C(1)   | 1.342(6) | C(13)-C(14)       | 1.417(6)   |
| N(1)-C(5)   | 1.361(5) | C(14)-C(15)       | 1.371(6)   |
| C(1)-C(2)   | 1.385(7) | C(14)-H(14)       | 0.9500     |
| C(1)-H(1)   | 0.9500   | C(15)-H(15)       | 0.9500     |
| F(2)-C(21)  | 1.336(7) | C(16)-H(16A)      | 0.9800     |
| O(2)-C(19)  | 1.150(5) | C(16)-H(16B)      | 0.9800     |
| N(2)-C(10)  | 1.345(6) | C(16)-H(16C)      | 0.9800     |
| N(2)-C(6)   | 1.357(6) | C(17)-H(17A)      | 0.9800     |
| C(2)-C(3)   | 1.382(7) | C(17)-H(17B)      | 0.9800     |
| C(2)-H(2)   | 0.9500   | C(17)-H(17C)      | 0.9800     |
| F(3)-C(21)  | 1.329(6) | C(1M)-O(1M)       | 1.020(16)  |
| O(3)-C(20)  | 1.137(6) | C(1M)-O(1M)#1     | 1.020(16)  |
| N(3)-C(11)  | 1.353(5) |                   |            |
| N(3)-C(15)  | 1.358(5) | C(18)-Re(1)-C(19) | 87.3(2)    |
| C(3)-C(4)   | 1.393(7) | C(18)-Re(1)-C(20) | 90.2(2)    |
| C(3)-H(3)   | 0.9500   | C(19)-Re(1)-C(20) | 88.55(18)  |
| N(4)-C(13)  | 1.349(6) | C(18)-Re(1)-N(2)  | 100.77(18) |
| N(4)-C(16)  | 1.460(6) | C(19)-Re(1)-N(2)  | 171.50(17) |
| N(4)-C(17)  | 1.460(6) | C(20)-Re(1)-N(2)  | 93.91(16)  |
| C(4)-C(5)   | 1.389(6) | C(18)-Re(1)-N(1)  | 172.54(17) |
| C(4)-H(4)   | 0.9500   | C(19)-Re(1)-N(1)  | 96.70(17)  |
| C(5)-C(6)   | 1.479(6) | C(20)-Re(1)-N(1)  | 96.14(18)  |

|                  |            |                   |          |
|------------------|------------|-------------------|----------|
| N(2)-Re(1)-N(1)  | 74.95(14)  | C(3)-C(4)-H(4)    | 120.2    |
| C(18)-Re(1)-N(3) | 91.60(16)  | N(1)-C(5)-C(4)    | 121.2(4) |
| C(19)-Re(1)-N(3) | 93.35(15)  | N(1)-C(5)-C(6)    | 114.9(4) |
| C(20)-Re(1)-N(3) | 177.44(16) | C(4)-C(5)-C(6)    | 123.8(4) |
| N(2)-Re(1)-N(3)  | 83.96(13)  | N(2)-C(6)-C(7)    | 121.6(4) |
| N(1)-Re(1)-N(3)  | 81.93(13)  | N(2)-C(6)-C(5)    | 115.6(4) |
| O(6)-S(1)-O(4)   | 115.1(3)   | C(7)-C(6)-C(5)    | 122.8(4) |
| O(6)-S(1)-O(5)   | 115.0(3)   | C(8)-C(7)-C(6)    | 119.1(5) |
| O(4)-S(1)-O(5)   | 114.3(2)   | C(8)-C(7)-H(7)    | 120.5    |
| O(6)-S(1)-C(21)  | 104.6(3)   | C(6)-C(7)-H(7)    | 120.5    |
| O(4)-S(1)-C(21)  | 102.4(2)   | C(9)-C(8)-C(7)    | 119.4(5) |
| O(5)-S(1)-C(21)  | 103.2(3)   | C(9)-C(8)-H(8)    | 120.3    |
| C(1)-N(1)-C(5)   | 118.7(4)   | C(7)-C(8)-H(8)    | 120.3    |
| C(1)-N(1)-Re(1)  | 124.4(3)   | C(8)-C(9)-C(10)   | 118.9(5) |
| C(5)-N(1)-Re(1)  | 116.5(3)   | C(8)-C(9)-H(9)    | 120.6    |
| N(1)-C(1)-C(2)   | 122.6(4)   | C(10)-C(9)-H(9)   | 120.6    |
| N(1)-C(1)-H(1)   | 118.7      | N(2)-C(10)-C(9)   | 122.9(5) |
| C(2)-C(1)-H(1)   | 118.7      | N(2)-C(10)-H(10)  | 118.5    |
| C(10)-N(2)-C(6)  | 118.1(4)   | C(9)-C(10)-H(10)  | 118.5    |
| C(10)-N(2)-Re(1) | 125.3(3)   | N(3)-C(11)-C(12)  | 124.5(4) |
| C(6)-N(2)-Re(1)  | 116.6(3)   | N(3)-C(11)-H(11)  | 117.8    |
| C(3)-C(2)-C(1)   | 119.2(4)   | C(12)-C(11)-H(11) | 117.8    |
| C(3)-C(2)-H(2)   | 120.4      | C(11)-C(12)-C(13) | 120.6(4) |
| C(1)-C(2)-H(2)   | 120.4      | C(11)-C(12)-H(12) | 119.7    |
| C(11)-N(3)-C(15) | 115.2(4)   | C(13)-C(12)-H(12) | 119.7    |
| C(11)-N(3)-Re(1) | 122.9(3)   | N(4)-C(13)-C(12)  | 123.5(4) |
| C(15)-N(3)-Re(1) | 121.9(3)   | N(4)-C(13)-C(14)  | 121.4(4) |
| C(2)-C(3)-C(4)   | 118.6(4)   | C(12)-C(13)-C(14) | 115.1(4) |
| C(2)-C(3)-H(3)   | 120.7      | C(15)-C(14)-C(13) | 120.1(4) |
| C(4)-C(3)-H(3)   | 120.7      | C(15)-C(14)-H(14) | 120.0    |
| C(13)-N(4)-C(16) | 122.2(4)   | C(13)-C(14)-H(14) | 120.0    |
| C(13)-N(4)-C(17) | 121.7(4)   | N(3)-C(15)-C(14)  | 124.5(4) |
| C(16)-N(4)-C(17) | 115.1(4)   | N(3)-C(15)-H(15)  | 117.7    |
| C(5)-C(4)-C(3)   | 119.6(4)   | C(14)-C(15)-H(15) | 117.7    |
| C(5)-C(4)-H(4)   | 120.2      | N(4)-C(16)-H(16A) | 109.5    |

|                     |       |                     |          |
|---------------------|-------|---------------------|----------|
| N(4)-C(16)-H(16B)   | 109.5 | O(1)-C(18)-Re(1)    | 178.2(4) |
| H(16A)-C(16)-H(16B) | 109.5 | O(2)-C(19)-Re(1)    | 178.4(5) |
| N(4)-C(16)-H(16C)   | 109.5 | O(3)-C(20)-Re(1)    | 179.0(4) |
| H(16A)-C(16)-H(16C) | 109.5 | F(1)-C(21)-F(3)     | 108.1(5) |
| H(16B)-C(16)-H(16C) | 109.5 | F(1)-C(21)-F(2)     | 107.4(6) |
| N(4)-C(17)-H(17A)   | 109.5 | F(3)-C(21)-F(2)     | 108.3(4) |
| N(4)-C(17)-H(17B)   | 109.5 | F(1)-C(21)-S(1)     | 111.0(4) |
| H(17A)-C(17)-H(17B) | 109.5 | F(3)-C(21)-S(1)     | 110.9(5) |
| N(4)-C(17)-H(17C)   | 109.5 | F(2)-C(21)-S(1)     | 111.0(4) |
| H(17A)-C(17)-H(17C) | 109.5 | O(1M)-C(1M)-O(1M)#1 | 150(3)   |
| H(17B)-C(17)-H(17C) | 109.5 |                     |          |

---

Symmetry transformations used to generate equivalent atoms:

#1 -x+1,y,-z+1/2

**Table 11.** Crystal data and structure refinement for **2c**.

|                                   |                                                                                   |                  |
|-----------------------------------|-----------------------------------------------------------------------------------|------------------|
| Identification code               | <b>2c</b>                                                                         |                  |
| Empirical formula                 | C <sub>21</sub> H <sub>23</sub> F <sub>6</sub> N <sub>5</sub> O <sub>4</sub> P Re |                  |
| Formula weight                    | 740.61                                                                            |                  |
| Temperature                       | 100(2) K                                                                          |                  |
| Wavelength                        | 0.71073 Å                                                                         |                  |
| Crystal system                    | Monoclinic                                                                        |                  |
| Space group                       | C 2/c                                                                             |                  |
| Unit cell dimensions              | a = 28.753(6) Å                                                                   | a = 90°.         |
|                                   | b = 14.023(3) Å                                                                   | b = 113.768(2)°. |
|                                   | c = 14.055(3) Å                                                                   | g = 90°.         |
| Volume                            | 5186.0(19) Å <sup>3</sup>                                                         |                  |
| Z                                 | 8                                                                                 |                  |
| Density (calculated)              | 1.897 Mg/m <sup>3</sup>                                                           |                  |
| Absorption coefficient            | 4.829 mm <sup>-1</sup>                                                            |                  |
| F(000)                            | 2880                                                                              |                  |
| Crystal size                      | 0.500 x 0.050 x 0.020 mm <sup>3</sup>                                             |                  |
| Theta range for data collection   | 1.548 to 27.471°.                                                                 |                  |
| Index ranges                      | -37<=h<=37, -17<=k<=18, -18<=l<=18                                                |                  |
| Reflections collected             | 29174                                                                             |                  |
| Independent reflections           | 5878 [R(int) = 0.0409]                                                            |                  |
| Completeness to theta = 25.242°   | 99.9 %                                                                            |                  |
| Absorption correction             | Semi-empirical from equivalents                                                   |                  |
| Max. and min. transmission        | 0.91 and 0.62                                                                     |                  |
| Refinement method                 | Full-matrix least-squares on F <sup>2</sup>                                       |                  |
| Data / restraints / parameters    | 5878 / 465 / 461                                                                  |                  |
| Goodness-of-fit on F <sup>2</sup> | 1.145                                                                             |                  |
| Final R indices [I>2sigma(I)]     | R1 = 0.0414, wR2 = 0.0814                                                         |                  |
| R indices (all data)              | R1 = 0.0514, wR2 = 0.0850                                                         |                  |
| Extinction coefficient            | n/a                                                                               |                  |
| Largest diff. peak and hole       | 2.915 and -3.174 e.Å <sup>-3</sup>                                                |                  |

**Table 12.** Bond lengths [Å] and angles [°] for **2c**.

|             |           |               |           |
|-------------|-----------|---------------|-----------|
| Re(1)-C(18) | 1.889(7)  | C(8)-H(8)     | 0.9500    |
| Re(1)-C(19) | 1.908(6)  | C(9)-H(9A)    | 0.9800    |
| Re(1)-C(17) | 1.918(8)  | C(9)-H(9B)    | 0.9800    |
| Re(1)-N(1') | 1.98(3)   | C(9)-H(9C)    | 0.9800    |
| Re(1)-N(1)  | 2.119(10) | N(1')-C(3')   | 1.26(4)   |
| Re(1)-N(2)  | 2.210(9)  | N(1')-C(1')   | 1.37(4)   |
| Re(1)-N(4)  | 2.223(5)  | C(1')-C(2')   | 1.34(5)   |
| Re(1)-N(2') | 2.26(3)   | C(1')-H(1')   | 0.9500    |
| P(1)-F(3)   | 1.583(4)  | N(2')-C(8')   | 1.37(5)   |
| P(1)-F(5)   | 1.584(5)  | N(2')-C(4')   | 1.41(4)   |
| P(1)-F(4)   | 1.585(4)  | C(2')-N(3')   | 1.40(4)   |
| P(1)-F(6)   | 1.589(5)  | C(2')-H(2')   | 0.9500    |
| P(1)-F(2)   | 1.602(4)  | N(3')-C(3')   | 1.39(4)   |
| P(1)-F(1)   | 1.606(4)  | N(3')-C(9')   | 1.46(3)   |
| O(1)-C(17)  | 1.150(9)  | C(3')-C(4')   | 1.46(4)   |
| N(1)-C(3)   | 1.329(12) | C(4')-C(5')   | 1.35(3)   |
| N(1)-C(1)   | 1.366(14) | C(5')-C(6')   | 1.37(3)   |
| C(1)-C(2)   | 1.509(19) | C(5')-H(5')   | 0.9500    |
| C(1)-H(1)   | 0.9500    | C(6')-C(7')   | 1.65(5)   |
| N(2)-C(4)   | 1.363(11) | C(6')-H(6')   | 0.9500    |
| N(2)-C(8)   | 1.363(13) | C(7')-C(8')   | 0.96(6)   |
| C(2)-N(3)   | 1.323(17) | C(7')-H(7')   | 0.9500    |
| C(2)-H(2)   | 0.9500    | C(8')-H(8')   | 0.9500    |
| N(3)-C(3)   | 1.378(11) | C(9')-H(9'1)  | 0.9800    |
| N(3)-C(9)   | 1.457(11) | C(9')-H(9'2)  | 0.9800    |
| C(3)-C(4)   | 1.461(12) | C(9')-H(9'3)  | 0.9800    |
| C(4)-C(5)   | 1.381(11) | O(2S)-O(2S)#1 | 1.286(15) |
| C(5)-C(6)   | 1.373(12) | O(2S)-C(3S)#1 | 1.286(15) |
| C(5)-H(5)   | 0.9500    | O(2)-C(18)    | 1.148(9)  |
| C(6)-C(7)   | 1.384(15) | O(3)-C(19)    | 1.152(7)  |
| C(6)-H(6)   | 0.9500    | N(4)-C(14)    | 1.355(7)  |
| C(7)-C(8)   | 1.371(15) | N(4)-C(10)    | 1.355(7)  |
| C(7)-H(7)   | 0.9500    | N(5)-C(12)    | 1.343(7)  |

|                   |          |                   |           |
|-------------------|----------|-------------------|-----------|
| N(5)-C(15)        | 1.457(8) | N(2)-Re(1)-N(4)   | 86.6(3)   |
| N(5)-C(16)        | 1.466(7) | C(18)-Re(1)-N(2') | 106.3(9)  |
| C(10)-C(11)       | 1.369(8) | C(19)-Re(1)-N(2') | 92.5(10)  |
| C(10)-H(10)       | 0.9500   | C(17)-Re(1)-N(2') | 163.1(9)  |
| C(11)-C(12)       | 1.412(8) | N(1')-Re(1)-N(2') | 76.0(11)  |
| C(11)-H(11)       | 0.9500   | N(4)-Re(1)-N(2')  | 87.4(10)  |
| C(12)-C(13)       | 1.416(8) | F(3)-P(1)-F(5)    | 90.8(3)   |
| C(13)-C(14)       | 1.371(8) | F(3)-P(1)-F(4)    | 91.6(2)   |
| C(13)-H(13)       | 0.9500   | F(5)-P(1)-F(4)    | 90.0(3)   |
| C(14)-H(14)       | 0.9500   | F(3)-P(1)-F(6)    | 90.6(3)   |
| C(15)-H(15A)      | 0.9800   | F(5)-P(1)-F(6)    | 177.9(3)  |
| C(15)-H(15B)      | 0.9800   | F(4)-P(1)-F(6)    | 91.5(3)   |
| C(15)-H(15C)      | 0.9800   | F(3)-P(1)-F(2)    | 89.2(2)   |
| C(16)-H(16A)      | 0.9800   | F(5)-P(1)-F(2)    | 89.7(3)   |
| C(16)-H(16B)      | 0.9800   | F(4)-P(1)-F(2)    | 179.1(3)  |
| C(16)-H(16C)      | 0.9800   | F(6)-P(1)-F(2)    | 88.8(3)   |
|                   |          | F(3)-P(1)-F(1)    | 179.0(3)  |
| C(18)-Re(1)-C(19) | 86.8(3)  | F(5)-P(1)-F(1)    | 89.7(3)   |
| C(18)-Re(1)-C(17) | 90.6(4)  | F(4)-P(1)-F(1)    | 89.3(2)   |
| C(19)-Re(1)-C(17) | 88.0(3)  | F(6)-P(1)-F(1)    | 88.8(3)   |
| C(18)-Re(1)-N(1') | 177.4(8) | F(2)-P(1)-F(1)    | 89.9(2)   |
| C(19)-Re(1)-N(1') | 94.4(9)  | C(3)-N(1)-C(1)    | 108.1(9)  |
| C(17)-Re(1)-N(1') | 87.1(8)  | C(3)-N(1)-Re(1)   | 117.0(7)  |
| C(18)-Re(1)-N(1)  | 97.4(4)  | C(1)-N(1)-Re(1)   | 134.5(7)  |
| C(19)-Re(1)-N(1)  | 93.8(4)  | N(1)-C(1)-C(2)    | 107.7(9)  |
| C(17)-Re(1)-N(1)  | 171.8(4) | N(1)-C(1)-H(1)    | 126.1     |
| C(18)-Re(1)-N(2)  | 171.6(4) | C(2)-C(1)-H(1)    | 126.1     |
| C(19)-Re(1)-N(2)  | 93.4(3)  | C(4)-N(2)-C(8)    | 116.5(9)  |
| C(17)-Re(1)-N(2)  | 97.8(4)  | C(4)-N(2)-Re(1)   | 117.9(6)  |
| N(1)-Re(1)-N(2)   | 74.1(3)  | C(8)-N(2)-Re(1)   | 125.6(7)  |
| C(18)-Re(1)-N(4)  | 93.2(2)  | N(3)-C(2)-C(1)    | 102.3(11) |
| C(19)-Re(1)-N(4)  | 179.8(3) | N(3)-C(2)-H(2)    | 128.8     |
| C(17)-Re(1)-N(4)  | 92.1(3)  | C(1)-C(2)-H(2)    | 128.8     |
| N(1')-Re(1)-N(4)  | 85.6(9)  | C(2)-N(3)-C(3)    | 112.5(9)  |
| N(1)-Re(1)-N(4)   | 86.1(3)  | C(2)-N(3)-C(9)    | 118.5(9)  |

|                   |           |                       |          |
|-------------------|-----------|-----------------------|----------|
| C(3)-N(3)-C(9)    | 128.9(8)  | C(1')-C(2')-H(2')     | 127.0    |
| N(1)-C(3)-N(3)    | 109.3(8)  | N(3')-C(2')-H(2')     | 127.0    |
| N(1)-C(3)-C(4)    | 120.0(8)  | C(3')-N(3')-C(2')     | 104(3)   |
| N(3)-C(3)-C(4)    | 130.6(9)  | C(3')-N(3')-C(9')     | 131(2)   |
| N(2)-C(4)-C(5)    | 123.0(9)  | C(2')-N(3')-C(9')     | 125(3)   |
| N(2)-C(4)-C(3)    | 110.5(7)  | N(1')-C(3')-N(3')     | 113(3)   |
| C(5)-C(4)-C(3)    | 126.4(10) | N(1')-C(3')-C(4')     | 124(3)   |
| C(6)-C(5)-C(4)    | 118.7(9)  | N(3')-C(3')-C(4')     | 124(3)   |
| C(6)-C(5)-H(5)    | 120.7     | C(5')-C(4')-N(2')     | 117(3)   |
| C(4)-C(5)-H(5)    | 120.7     | C(5')-C(4')-C(3')     | 135(3)   |
| C(5)-C(6)-C(7)    | 119.7(10) | N(2')-C(4')-C(3')     | 109(2)   |
| C(5)-C(6)-H(6)    | 120.1     | C(4')-C(5')-C(6')     | 121(2)   |
| C(7)-C(6)-H(6)    | 120.1     | C(4')-C(5')-H(5')     | 119.6    |
| C(8)-C(7)-C(6)    | 118.8(11) | C(6')-C(5')-H(5')     | 119.6    |
| C(8)-C(7)-H(7)    | 120.6     | C(5')-C(6')-C(7')     | 112(3)   |
| C(6)-C(7)-H(7)    | 120.6     | C(5')-C(6')-H(6')     | 123.8    |
| N(2)-C(8)-C(7)    | 123.2(10) | C(7')-C(6')-H(6')     | 123.8    |
| N(2)-C(8)-H(8)    | 118.4     | C(8')-C(7')-C(6')     | 120(5)   |
| C(7)-C(8)-H(8)    | 118.4     | C(8')-C(7')-H(7')     | 119.8    |
| N(3)-C(9)-H(9A)   | 109.5     | C(6')-C(7')-H(7')     | 119.8    |
| N(3)-C(9)-H(9B)   | 109.5     | C(7')-C(8')-N(2')     | 129(4)   |
| H(9A)-C(9)-H(9B)  | 109.5     | C(7')-C(8')-H(8')     | 115.4    |
| N(3)-C(9)-H(9C)   | 109.5     | N(2')-C(8')-H(8')     | 115.4    |
| H(9A)-C(9)-H(9C)  | 109.5     | N(3')-C(9')-H(9'1)    | 109.5    |
| H(9B)-C(9)-H(9C)  | 109.5     | N(3')-C(9')-H(9'2)    | 109.5    |
| C(3')-N(1')-C(1') | 106(3)    | H(9'1)-C(9')-H(9'2)   | 109.5    |
| C(3')-N(1')-Re(1) | 119(2)    | N(3')-C(9')-H(9'3)    | 109.5    |
| C(1')-N(1')-Re(1) | 134(2)    | H(9'1)-C(9')-H(9'3)   | 109.5    |
| C(2')-C(1')-N(1') | 111(3)    | H(9'2)-C(9')-H(9'3)   | 109.5    |
| C(2')-C(1')-H(1') | 124.6     | O(2S)#1-O(2S)-C(3S)#1 | 0.0(6)   |
| N(1')-C(1')-H(1') | 124.6     | C(14)-N(4)-C(10)      | 114.6(5) |
| C(8')-N(2')-C(4') | 120(3)    | C(14)-N(4)-Re(1)      | 120.5(4) |
| C(8')-N(2')-Re(1) | 128(2)    | C(10)-N(4)-Re(1)      | 124.7(4) |
| C(4')-N(2')-Re(1) | 113(2)    | C(12)-N(5)-C(15)      | 121.4(5) |
| C(1')-C(2')-N(3') | 106(4)    | C(12)-N(5)-C(16)      | 121.4(5) |



|                   |          |                     |           |
|-------------------|----------|---------------------|-----------|
| C(15)-N(5)-C(16)  | 116.9(5) | N(5)-C(15)-H(15A)   | 109.5     |
| N(4)-C(10)-C(11)  | 124.5(5) | N(5)-C(15)-H(15B)   | 109.5     |
| N(4)-C(10)-H(10)  | 117.7    | H(15A)-C(15)-H(15B) | 109.5     |
| C(11)-C(10)-H(10) | 117.7    | N(5)-C(15)-H(15C)   | 109.5     |
| C(10)-C(11)-C(12) | 120.9(6) | H(15A)-C(15)-H(15C) | 109.5     |
| C(10)-C(11)-H(11) | 119.5    | H(15B)-C(15)-H(15C) | 109.5     |
| C(12)-C(11)-H(11) | 119.5    | N(5)-C(16)-H(16A)   | 109.5     |
| N(5)-C(12)-C(11)  | 123.0(6) | N(5)-C(16)-H(16B)   | 109.5     |
| N(5)-C(12)-C(13)  | 122.6(5) | H(16A)-C(16)-H(16B) | 109.5     |
| C(11)-C(12)-C(13) | 114.4(5) | N(5)-C(16)-H(16C)   | 109.5     |
| C(14)-C(13)-C(12) | 120.4(5) | H(16A)-C(16)-H(16C) | 109.5     |
| C(14)-C(13)-H(13) | 119.8    | H(16B)-C(16)-H(16C) | 109.5     |
| C(12)-C(13)-H(13) | 119.8    | O(1)-C(17)-Re(1)    | 177.4(10) |
| N(4)-C(14)-C(13)  | 124.9(6) | O(2)-C(18)-Re(1)    | 178.1(7)  |
| N(4)-C(14)-H(14)  | 117.6    | O(3)-C(19)-Re(1)    | 177.4(6)  |
| C(13)-C(14)-H(14) | 117.6    |                     |           |

---

Symmetry transformations used to generate equivalent atoms:

#1 -x,y,-z+1/2

**Table 13.** Crystal data and structure refinement for **3c**.

|                                   |                                                                                                                                                                            |
|-----------------------------------|----------------------------------------------------------------------------------------------------------------------------------------------------------------------------|
| Identification code               | <b>3c</b>                                                                                                                                                                  |
| Empirical formula                 | C <sub>25</sub> H <sub>22</sub> F <sub>3</sub> N <sub>6</sub> O <sub>6</sub> Re S                                                                                          |
| Formula weight                    | 777.74                                                                                                                                                                     |
| Temperature                       | 100(2) K                                                                                                                                                                   |
| Wavelength                        | 0.71073 Å                                                                                                                                                                  |
| Crystal system                    | Triclinic                                                                                                                                                                  |
| Space group                       | P -1                                                                                                                                                                       |
| Unit cell dimensions              | a = 8.3595(8) Å                      a = 86.3080(10)°.<br>b = 11.0688(10) Å                    b = 87.1240(10)°.<br>c = 14.8076(13) Å                    g = 86.9900(10)°. |
| Volume                            | 1363.9(2) Å <sup>3</sup>                                                                                                                                                   |
| Z                                 | 2                                                                                                                                                                          |
| Density (calculated)              | 1.894 Mg/m <sup>3</sup>                                                                                                                                                    |
| Absorption coefficient            | 4.604 mm <sup>-1</sup>                                                                                                                                                     |
| F(000)                            | 760                                                                                                                                                                        |
| Crystal size                      | 0.550 x 0.350 x 0.150 mm <sup>3</sup>                                                                                                                                      |
| Theta range for data collection   | 1.846 to 27.661°.                                                                                                                                                          |
| Index ranges                      | -10 ≤ h ≤ 10, -14 ≤ k ≤ 14, -19 ≤ l ≤ 19                                                                                                                                   |
| Reflections collected             | 15308                                                                                                                                                                      |
| Independent reflections           | 6193 [R(int) = 0.0231]                                                                                                                                                     |
| Completeness to theta = 25.242°   | 99.8 %                                                                                                                                                                     |
| Absorption correction             | Semi-empirical from equivalents                                                                                                                                            |
| Max. and min. transmission        | 0.55 and 0.35                                                                                                                                                              |
| Refinement method                 | Full-matrix least-squares on F <sup>2</sup>                                                                                                                                |
| Data / restraints / parameters    | 6193 / 0 / 381                                                                                                                                                             |
| Goodness-of-fit on F <sup>2</sup> | 1.031                                                                                                                                                                      |
| Final R indices [I > 2σ(I)]       | R1 = 0.0187, wR2 = 0.0438                                                                                                                                                  |
| R indices (all data)              | R1 = 0.0206, wR2 = 0.0446                                                                                                                                                  |
| Extinction coefficient            | n/a                                                                                                                                                                        |
| Largest diff. peak and hole       | 1.247 and -0.746 e.Å <sup>-3</sup>                                                                                                                                         |

**Table 14.** Bond lengths [Å] and angles [°] for **3c**.

|             |            |              |          |
|-------------|------------|--------------|----------|
| Re(1)-C(24) | 1.915(3)   | N(6)-C(20)   | 1.461(3) |
| Re(1)-C(23) | 1.924(2)   | N(6)-C(21)   | 1.461(3) |
| Re(1)-C(22) | 1.929(2)   | C(6)-C(7)    | 1.383(3) |
| Re(1)-N(1)  | 2.1401(19) | C(6)-H(6)    | 0.9500   |
| Re(1)-N(4)  | 2.1939(19) | C(7)-H(7)    | 0.9500   |
| Re(1)-N(5)  | 2.206(2)   | C(8)-C(9)    | 1.512(3) |
| S(1)-O(6)   | 1.4345(19) | C(8)-H(8A)   | 0.9900   |
| S(1)-O(5)   | 1.441(2)   | C(8)-H(8B)   | 0.9900   |
| S(1)-O(4)   | 1.450(2)   | C(9)-C(14)   | 1.386(4) |
| S(1)-C(25)  | 1.823(3)   | C(9)-C(10)   | 1.388(4) |
| F(1)-C(25)  | 1.332(3)   | C(10)-C(11)  | 1.389(4) |
| O(1)-C(22)  | 1.152(3)   | C(10)-H(10)  | 0.9500   |
| N(1)-N(2)   | 1.319(3)   | C(11)-C(12)  | 1.375(4) |
| N(1)-C(1)   | 1.366(3)   | C(11)-H(11)  | 0.9500   |
| C(1)-C(2)   | 1.372(3)   | C(12)-C(13)  | 1.381(5) |
| C(1)-C(3)   | 1.462(3)   | C(12)-H(12)  | 0.9500   |
| F(2)-C(25)  | 1.328(3)   | C(13)-C(14)  | 1.384(4) |
| O(2)-C(23)  | 1.157(3)   | C(13)-H(13)  | 0.9500   |
| N(2)-N(3)   | 1.342(3)   | C(14)-H(14)  | 0.9500   |
| C(2)-N(3)   | 1.348(3)   | C(15)-C(16)  | 1.368(3) |
| C(2)-H(2)   | 0.9500     | C(15)-H(15)  | 0.9500   |
| F(3)-C(25)  | 1.330(3)   | C(16)-C(17)  | 1.416(3) |
| O(3)-C(24)  | 1.153(3)   | C(16)-H(16)  | 0.9500   |
| N(3)-C(8)   | 1.483(3)   | C(17)-C(18)  | 1.423(3) |
| C(3)-N(4)   | 1.358(3)   | C(18)-C(19)  | 1.370(3) |
| C(3)-C(4)   | 1.387(3)   | C(18)-H(18)  | 0.9500   |
| N(4)-C(7)   | 1.351(3)   | C(19)-H(19)  | 0.9500   |
| C(4)-C(5)   | 1.384(3)   | C(20)-H(20A) | 0.9800   |
| C(4)-H(4)   | 0.9500     | C(20)-H(20B) | 0.9800   |
| N(5)-C(15)  | 1.348(3)   | C(20)-H(20C) | 0.9800   |
| N(5)-C(19)  | 1.361(3)   | C(21)-H(21A) | 0.9800   |
| C(5)-C(6)   | 1.389(3)   | C(21)-H(21B) | 0.9800   |
| C(5)-H(5)   | 0.9500     | C(21)-H(21C) | 0.9800   |
| N(6)-C(17)  | 1.346(3)   |              |          |

|                   |            |                   |            |
|-------------------|------------|-------------------|------------|
| C(24)-Re(1)-C(23) | 92.05(10)  | N(4)-C(3)-C(1)    | 113.8(2)   |
| C(24)-Re(1)-C(22) | 87.71(10)  | C(4)-C(3)-C(1)    | 123.6(2)   |
| C(23)-Re(1)-C(22) | 89.61(10)  | C(7)-N(4)-C(3)    | 118.1(2)   |
| C(24)-Re(1)-N(1)  | 93.70(9)   | C(7)-N(4)-Re(1)   | 124.32(15) |
| C(23)-Re(1)-N(1)  | 97.47(8)   | C(3)-N(4)-Re(1)   | 117.52(15) |
| C(22)-Re(1)-N(1)  | 172.72(8)  | C(5)-C(4)-C(3)    | 118.7(2)   |
| C(24)-Re(1)-N(4)  | 94.09(8)   | C(5)-C(4)-H(4)    | 120.7      |
| C(23)-Re(1)-N(4)  | 170.17(8)  | C(3)-C(4)-H(4)    | 120.7      |
| C(22)-Re(1)-N(4)  | 98.29(8)   | C(15)-N(5)-C(19)  | 115.9(2)   |
| N(1)-Re(1)-N(4)   | 74.49(7)   | C(15)-N(5)-Re(1)  | 122.12(16) |
| C(24)-Re(1)-N(5)  | 176.11(8)  | C(19)-N(5)-Re(1)  | 121.99(16) |
| C(23)-Re(1)-N(5)  | 90.98(9)   | C(4)-C(5)-C(6)    | 119.0(2)   |
| C(22)-Re(1)-N(5)  | 94.74(9)   | C(4)-C(5)-H(5)    | 120.5      |
| N(1)-Re(1)-N(5)   | 83.49(7)   | C(6)-C(5)-H(5)    | 120.5      |
| N(4)-Re(1)-N(5)   | 82.59(7)   | C(17)-N(6)-C(20)  | 121.1(2)   |
| O(6)-S(1)-O(5)    | 115.57(12) | C(17)-N(6)-C(21)  | 120.9(2)   |
| O(6)-S(1)-O(4)    | 114.47(13) | C(20)-N(6)-C(21)  | 117.7(2)   |
| O(5)-S(1)-O(4)    | 115.23(13) | C(7)-C(6)-C(5)    | 119.6(2)   |
| O(6)-S(1)-C(25)   | 103.43(13) | C(7)-C(6)-H(6)    | 120.2      |
| O(5)-S(1)-C(25)   | 103.90(13) | C(5)-C(6)-H(6)    | 120.2      |
| O(4)-S(1)-C(25)   | 101.66(13) | N(4)-C(7)-C(6)    | 122.0(2)   |
| N(2)-N(1)-C(1)    | 110.61(19) | N(4)-C(7)-H(7)    | 119.0      |
| N(2)-N(1)-Re(1)   | 131.86(15) | C(6)-C(7)-H(7)    | 119.0      |
| C(1)-N(1)-Re(1)   | 117.45(15) | N(3)-C(8)-C(9)    | 109.67(19) |
| N(1)-C(1)-C(2)    | 107.4(2)   | N(3)-C(8)-H(8A)   | 109.7      |
| N(1)-C(1)-C(3)    | 116.7(2)   | C(9)-C(8)-H(8A)   | 109.7      |
| C(2)-C(1)-C(3)    | 135.9(2)   | N(3)-C(8)-H(8B)   | 109.7      |
| N(1)-N(2)-N(3)    | 104.98(18) | C(9)-C(8)-H(8B)   | 109.7      |
| N(3)-C(2)-C(1)    | 104.2(2)   | H(8A)-C(8)-H(8B)  | 108.2      |
| N(3)-C(2)-H(2)    | 127.9      | C(14)-C(9)-C(10)  | 119.3(2)   |
| C(1)-C(2)-H(2)    | 127.9      | C(14)-C(9)-C(8)   | 120.0(2)   |
| N(2)-N(3)-C(2)    | 112.81(19) | C(10)-C(9)-C(8)   | 120.6(2)   |
| N(2)-N(3)-C(8)    | 118.84(19) | C(9)-C(10)-C(11)  | 119.6(3)   |
| C(2)-N(3)-C(8)    | 128.0(2)   | C(9)-C(10)-H(10)  | 120.2      |
| N(4)-C(3)-C(4)    | 122.7(2)   | C(11)-C(10)-H(10) | 120.2      |

|                   |          |                     |            |
|-------------------|----------|---------------------|------------|
| C(12)-C(11)-C(10) | 121.0(3) | N(5)-C(19)-C(18)    | 123.7(2)   |
| C(12)-C(11)-H(11) | 119.5    | N(5)-C(19)-H(19)    | 118.1      |
| C(10)-C(11)-H(11) | 119.5    | C(18)-C(19)-H(19)   | 118.1      |
| C(11)-C(12)-C(13) | 119.3(3) | N(6)-C(20)-H(20A)   | 109.5      |
| C(11)-C(12)-H(12) | 120.3    | N(6)-C(20)-H(20B)   | 109.5      |
| C(13)-C(12)-H(12) | 120.3    | H(20A)-C(20)-H(20B) | 109.5      |
| C(12)-C(13)-C(14) | 120.3(3) | N(6)-C(20)-H(20C)   | 109.5      |
| C(12)-C(13)-H(13) | 119.8    | H(20A)-C(20)-H(20C) | 109.5      |
| C(14)-C(13)-H(13) | 119.8    | H(20B)-C(20)-H(20C) | 109.5      |
| C(13)-C(14)-C(9)  | 120.4(3) | N(6)-C(21)-H(21A)   | 109.5      |
| C(13)-C(14)-H(14) | 119.8    | N(6)-C(21)-H(21B)   | 109.5      |
| C(9)-C(14)-H(14)  | 119.8    | H(21A)-C(21)-H(21B) | 109.5      |
| N(5)-C(15)-C(16)  | 124.5(2) | N(6)-C(21)-H(21C)   | 109.5      |
| N(5)-C(15)-H(15)  | 117.8    | H(21A)-C(21)-H(21C) | 109.5      |
| C(16)-C(15)-H(15) | 117.8    | H(21B)-C(21)-H(21C) | 109.5      |
| C(15)-C(16)-C(17) | 120.4(2) | O(1)-C(22)-Re(1)    | 177.7(2)   |
| C(15)-C(16)-H(16) | 119.8    | O(2)-C(23)-Re(1)    | 176.8(2)   |
| C(17)-C(16)-H(16) | 119.8    | O(3)-C(24)-Re(1)    | 179.3(2)   |
| N(6)-C(17)-C(16)  | 123.0(2) | F(2)-C(25)-F(3)     | 107.2(2)   |
| N(6)-C(17)-C(18)  | 122.0(2) | F(2)-C(25)-F(1)     | 107.6(2)   |
| C(16)-C(17)-C(18) | 115.0(2) | F(3)-C(25)-F(1)     | 107.5(2)   |
| C(19)-C(18)-C(17) | 120.5(2) | F(2)-C(25)-S(1)     | 111.1(2)   |
| C(19)-C(18)-H(18) | 119.7    | F(3)-C(25)-S(1)     | 111.58(19) |
| C(17)-C(18)-H(18) | 119.7    | F(1)-C(25)-S(1)     | 111.66(18) |

---

Symmetry transformations used to generate equivalent atoms:

**Table 15.** Crystal data and structure refinement for **5c**.

|                                   |                                                                                                            |
|-----------------------------------|------------------------------------------------------------------------------------------------------------|
| Identification code               | <b>5c</b>                                                                                                  |
| Empirical formula                 | C15 H15 N4 O5 Re                                                                                           |
| Formula weight                    | 517.51                                                                                                     |
| Temperature                       | 100(2) K                                                                                                   |
| Wavelength                        | 0.71073 Å                                                                                                  |
| Crystal system                    | Monoclinic                                                                                                 |
| Space group                       | C c                                                                                                        |
| Unit cell dimensions              | a = 16.127(2) Å      a = 90°.<br>b = 15.010(2) Å      b = 109.0350(10)°.<br>c = 7.2212(10) Å      g = 90°. |
| Volume                            | 1652.4(4) Å <sup>3</sup>                                                                                   |
| Z                                 | 4                                                                                                          |
| Density (calculated)              | 2.080 Mg/m <sup>3</sup>                                                                                    |
| Absorption coefficient            | 7.389 mm <sup>-1</sup>                                                                                     |
| F(000)                            | 992                                                                                                        |
| Crystal size                      | 0.500 x 0.300 x 0.150 mm <sup>3</sup>                                                                      |
| Theta range for data collection   | 1.904 to 27.451°.                                                                                          |
| Index ranges                      | -20 ≤ h ≤ 20, -19 ≤ k ≤ 19, -9 ≤ l ≤ 9                                                                     |
| Reflections collected             | 7212                                                                                                       |
| Independent reflections           | 3612 [R(int) = 0.0211]                                                                                     |
| Completeness to theta = 25.242°   | 100.0 %                                                                                                    |
| Absorption correction             | Semi-empirical from equivalents                                                                            |
| Max. and min. transmission        | 0.40 and 0.19                                                                                              |
| Refinement method                 | Full-matrix least-squares on F <sup>2</sup>                                                                |
| Data / restraints / parameters    | 3612 / 2 / 230                                                                                             |
| Goodness-of-fit on F <sup>2</sup> | 0.888                                                                                                      |
| Final R indices [I > 2σ(I)]       | R1 = 0.0163, wR2 = 0.0373                                                                                  |
| R indices (all data)              | R1 = 0.0167, wR2 = 0.0374                                                                                  |
| Absolute structure parameter      | 0.012(9)                                                                                                   |
| Extinction coefficient            | n/a                                                                                                        |
| Largest diff. peak and hole       | 0.940 and -1.027 e.Å <sup>-3</sup>                                                                         |

**Table 16.** Bond lengths [Å] and angles [°] for **5c**.

|             |          |                   |            |
|-------------|----------|-------------------|------------|
| Re(1)-C(13) | 1.899(6) | C(9)-H(9)         | 0.9500     |
| Re(1)-C(15) | 1.920(5) | C(10)-H(10)       | 0.9500     |
| Re(1)-C(14) | 1.923(6) | C(11)-H(11A)      | 0.9800     |
| Re(1)-N(1)  | 2.152(4) | C(11)-H(11B)      | 0.9800     |
| Re(1)-O(1)  | 2.161(4) | C(11)-H(11C)      | 0.9800     |
| Re(1)-N(3)  | 2.226(4) | C(12)-H(12A)      | 0.9800     |
| O(1)-C(4)   | 1.299(6) | C(12)-H(12B)      | 0.9800     |
| N(1)-C(3)   | 1.344(6) | C(12)-H(12C)      | 0.9800     |
| N(1)-C(1)   | 1.378(6) |                   |            |
| C(1)-C(2)   | 1.367(7) | C(13)-Re(1)-C(15) | 86.8(2)    |
| C(1)-H(1)   | 0.9500   | C(13)-Re(1)-C(14) | 88.8(2)    |
| O(2)-C(4)   | 1.227(6) | C(15)-Re(1)-C(14) | 88.7(2)    |
| N(2)-C(3)   | 1.343(7) | C(13)-Re(1)-N(1)  | 99.4(2)    |
| N(2)-C(2)   | 1.372(7) | C(15)-Re(1)-N(1)  | 95.04(19)  |
| N(2)-C(5)   | 1.466(7) | C(14)-Re(1)-N(1)  | 171.16(19) |
| C(2)-H(2)   | 0.9500   | C(13)-Re(1)-O(1)  | 173.9(2)   |
| O(3)-C(13)  | 1.157(7) | C(15)-Re(1)-O(1)  | 96.59(19)  |
| N(3)-C(6)   | 1.353(7) | C(14)-Re(1)-O(1)  | 96.33(19)  |
| N(3)-C(10)  | 1.374(8) | N(1)-Re(1)-O(1)   | 75.32(16)  |
| C(3)-C(4)   | 1.487(7) | C(13)-Re(1)-N(3)  | 92.3(2)    |
| O(4)-C(14)  | 1.140(6) | C(15)-Re(1)-N(3)  | 178.94(19) |
| N(4)-C(8)   | 1.357(7) | C(14)-Re(1)-N(3)  | 90.76(19)  |
| N(4)-C(12)  | 1.445(7) | N(1)-Re(1)-N(3)   | 85.58(16)  |
| N(4)-C(11)  | 1.452(7) | O(1)-Re(1)-N(3)   | 84.40(15)  |
| O(5)-C(15)  | 1.148(6) | C(4)-O(1)-Re(1)   | 119.3(3)   |
| C(5)-H(5A)  | 0.9800   | C(3)-N(1)-C(1)    | 106.4(4)   |
| C(5)-H(5B)  | 0.9800   | C(3)-N(1)-Re(1)   | 113.9(3)   |
| C(5)-H(5C)  | 0.9800   | C(1)-N(1)-Re(1)   | 139.5(3)   |
| C(6)-C(7)   | 1.366(7) | C(2)-C(1)-N(1)    | 108.7(4)   |
| C(6)-H(6)   | 0.9500   | C(2)-C(1)-H(1)    | 125.6      |
| C(7)-C(8)   | 1.412(7) | N(1)-C(1)-H(1)    | 125.6      |
| C(7)-H(7)   | 0.9500   | C(3)-N(2)-C(2)    | 108.0(4)   |
| C(8)-C(9)   | 1.413(7) | C(3)-N(2)-C(5)    | 127.7(5)   |
| C(9)-C(10)  | 1.369(8) | C(2)-N(2)-C(5)    | 124.3(5)   |

|                  |          |                     |          |
|------------------|----------|---------------------|----------|
| C(1)-C(2)-N(2)   | 106.7(5) | C(8)-C(7)-H(7)      | 119.9    |
| C(1)-C(2)-H(2)   | 126.7    | N(4)-C(8)-C(7)      | 123.2(5) |
| N(2)-C(2)-H(2)   | 126.7    | N(4)-C(8)-C(9)      | 122.3(5) |
| C(6)-N(3)-C(10)  | 115.7(5) | C(7)-C(8)-C(9)      | 114.5(5) |
| C(6)-N(3)-Re(1)  | 125.3(3) | C(10)-C(9)-C(8)     | 122.5(6) |
| C(10)-N(3)-Re(1) | 119.0(4) | C(10)-C(9)-H(9)     | 118.8    |
| N(2)-C(3)-N(1)   | 110.2(4) | C(8)-C(9)-H(9)      | 118.8    |
| N(2)-C(3)-C(4)   | 130.4(5) | C(9)-C(10)-N(3)     | 122.0(7) |
| N(1)-C(3)-C(4)   | 119.3(4) | C(9)-C(10)-H(10)    | 119.0    |
| C(8)-N(4)-C(12)  | 120.7(5) | N(3)-C(10)-H(10)    | 119.0    |
| C(8)-N(4)-C(11)  | 120.9(5) | N(4)-C(11)-H(11A)   | 109.5    |
| C(12)-N(4)-C(11) | 118.2(5) | N(4)-C(11)-H(11B)   | 109.5    |
| O(2)-C(4)-O(1)   | 126.1(5) | H(11A)-C(11)-H(11B) | 109.5    |
| O(2)-C(4)-C(3)   | 121.7(5) | N(4)-C(11)-H(11C)   | 109.5    |
| O(1)-C(4)-C(3)   | 112.2(4) | H(11A)-C(11)-H(11C) | 109.5    |
| N(2)-C(5)-H(5A)  | 109.5    | H(11B)-C(11)-H(11C) | 109.5    |
| N(2)-C(5)-H(5B)  | 109.5    | N(4)-C(12)-H(12A)   | 109.5    |
| H(5A)-C(5)-H(5B) | 109.5    | N(4)-C(12)-H(12B)   | 109.5    |
| N(2)-C(5)-H(5C)  | 109.5    | H(12A)-C(12)-H(12B) | 109.5    |
| H(5A)-C(5)-H(5C) | 109.5    | N(4)-C(12)-H(12C)   | 109.5    |
| H(5B)-C(5)-H(5C) | 109.5    | H(12A)-C(12)-H(12C) | 109.5    |
| N(3)-C(6)-C(7)   | 125.1(5) | H(12B)-C(12)-H(12C) | 109.5    |
| N(3)-C(6)-H(6)   | 117.4    | O(3)-C(13)-Re(1)    | 178.7(5) |
| C(7)-C(6)-H(6)   | 117.4    | O(4)-C(14)-Re(1)    | 179.2(5) |
| C(6)-C(7)-C(8)   | 120.1(5) | O(5)-C(15)-Re(1)    | 176.3(5) |
| C(6)-C(7)-H(7)   | 119.9    |                     |          |

---

Symmetry transformations used to generate equivalent atoms:



**Table 17.** Crystal data and structure refinement for **6c**.

|                                   |                                                                  |                                                        |
|-----------------------------------|------------------------------------------------------------------|--------------------------------------------------------|
| Identification code               | <b>6c</b>                                                        |                                                        |
| Empirical formula                 | C <sub>21</sub> H <sub>22</sub> N <sub>5</sub> O <sub>6</sub> Re |                                                        |
| Formula weight                    | 626.63                                                           |                                                        |
| Temperature                       | 100(2) K                                                         |                                                        |
| Wavelength                        | 0.71073 Å                                                        |                                                        |
| Crystal system                    | Triclinic                                                        |                                                        |
| Space group                       | P -1                                                             |                                                        |
| Unit cell dimensions              | a = 9.0901(17) Å<br>b = 9.3897(18) Å<br>c = 14.340(3) Å          | a = 101.832(2)°.<br>b = 98.774(2)°.<br>g = 94.619(2)°. |
| Volume                            | 1176.0(4) Å <sup>3</sup>                                         |                                                        |
| Z                                 | 2                                                                |                                                        |
| Density (calculated)              | 1.770 Mg/m <sup>3</sup>                                          |                                                        |
| Absorption coefficient            | 5.212 mm <sup>-1</sup>                                           |                                                        |
| F(000)                            | 612                                                              |                                                        |
| Crystal size                      | 0.450 x 0.450 x 0.400 mm <sup>3</sup>                            |                                                        |
| Theta range for data collection   | 2.231 to 27.506°.                                                |                                                        |
| Index ranges                      | -11 ≤ h ≤ 11, -12 ≤ k ≤ 12, -17 ≤ l ≤ 18                         |                                                        |
| Reflections collected             | 22902                                                            |                                                        |
| Independent reflections           | 5324 [R(int) = 0.0369]                                           |                                                        |
| Completeness to theta = 25.242°   | 99.8 %                                                           |                                                        |
| Absorption correction             | Semi-empirical from equivalents                                  |                                                        |
| Max. and min. transmission        | 0.23 and 0.12                                                    |                                                        |
| Refinement method                 | Full-matrix least-squares on F <sup>2</sup>                      |                                                        |
| Data / restraints / parameters    | 5324 / 0 / 305                                                   |                                                        |
| Goodness-of-fit on F <sup>2</sup> | 1.030                                                            |                                                        |
| Final R indices [I > 2σ(I)]       | R1 = 0.0166, wR2 = 0.0429                                        |                                                        |
| R indices (all data)              | R1 = 0.0177, wR2 = 0.0432                                        |                                                        |
| Extinction coefficient            | n/a                                                              |                                                        |
| Largest diff. peak and hole       | 1.290 and -1.186 e.Å <sup>-3</sup>                               |                                                        |

**Table 18.** Bond lengths [Å] and angles [°] for **6c**.

|              |            |                   |           |
|--------------|------------|-------------------|-----------|
| Re(1)-C(18)  | 1.903(2)   | C(1M)-H(1M2)      | 0.9800    |
| Re(1)-C(19)  | 1.919(3)   | C(1M)-H(1M3)      | 0.9800    |
| Re(1)-C(20)  | 1.923(2)   | C(7)-C(8)         | 1.388(4)  |
| Re(1)-N(1)   | 2.153(2)   | C(7)-H(7)         | 0.9500    |
| Re(1)-O(1)   | 2.1613(16) | C(8)-C(9)         | 1.378(4)  |
| Re(1)-N(4)   | 2.1905(19) | C(8)-H(8)         | 0.9500    |
| O(1)-C(3)    | 1.278(3)   | C(9)-C(10)        | 1.395(4)  |
| N(1)-N(3)    | 1.320(3)   | C(9)-H(9)         | 0.9500    |
| N(1)-C(1)    | 1.357(3)   | C(10)-H(10)       | 0.9500    |
| C(1)-C(2)    | 1.370(3)   | C(11)-C(12)       | 1.370(3)  |
| C(1)-C(3)    | 1.490(3)   | C(11)-H(11)       | 0.9500    |
| O(2)-C(3)    | 1.235(3)   | C(12)-C(13)       | 1.417(3)  |
| N(2)-C(2)    | 1.344(3)   | C(12)-H(12)       | 0.9500    |
| N(2)-N(3)    | 1.346(3)   | C(13)-C(14)       | 1.418(3)  |
| N(2)-C(4)    | 1.474(3)   | C(14)-C(15)       | 1.368(3)  |
| C(2)-H(2)    | 0.9500     | C(14)-H(14)       | 0.9500    |
| O(3)-C(18)   | 1.159(3)   | C(15)-H(15)       | 0.9500    |
| O(4)-C(19)   | 1.153(3)   | C(16)-H(16A)      | 0.9800    |
| N(4)-C(15)   | 1.354(3)   | C(16)-H(16B)      | 0.9800    |
| N(4)-C(11)   | 1.359(3)   | C(16)-H(16C)      | 0.9800    |
| C(4)-C(5)    | 1.510(3)   | C(17)-H(17A)      | 0.9800    |
| C(4)-H(4A)   | 0.9900     | C(17)-H(17B)      | 0.9800    |
| C(4)-H(4B)   | 0.9900     | C(17)-H(17C)      | 0.9800    |
| O(5)-C(20)   | 1.154(3)   |                   |           |
| N(5)-C(13)   | 1.345(3)   | C(18)-Re(1)-C(19) | 90.72(10) |
| N(5)-C(17)   | 1.458(3)   | C(18)-Re(1)-C(20) | 90.56(10) |
| N(5)-C(16)   | 1.463(3)   | C(19)-Re(1)-C(20) | 89.09(10) |
| C(5)-C(6)    | 1.385(4)   | C(18)-Re(1)-N(1)  | 98.34(9)  |
| C(5)-C(10)   | 1.390(4)   | C(19)-Re(1)-N(1)  | 170.69(8) |
| O(1M)-C(1M)  | 1.411(3)   | C(20)-Re(1)-N(1)  | 92.93(9)  |
| O(1M)-H(1M)  | 0.83(5)    | C(18)-Re(1)-O(1)  | 172.75(8) |
| C(6)-C(7)    | 1.387(4)   | C(19)-Re(1)-O(1)  | 95.60(8)  |
| C(6)-H(6)    | 0.9500     | C(20)-Re(1)-O(1)  | 93.10(8)  |
| C(1M)-H(1M1) | 0.9800     | N(1)-Re(1)-O(1)   | 75.23(7)  |

|                  |            |                     |          |
|------------------|------------|---------------------|----------|
| C(18)-Re(1)-N(4) | 94.95(8)   | C(6)-C(5)-C(4)      | 120.5(2) |
| C(19)-Re(1)-N(4) | 95.31(9)   | C(10)-C(5)-C(4)     | 120.2(2) |
| C(20)-Re(1)-N(4) | 172.90(8)  | C(1M)-O(1M)-H(1M)   | 111(3)   |
| N(1)-Re(1)-N(4)  | 81.86(7)   | C(5)-C(6)-C(7)      | 120.3(3) |
| O(1)-Re(1)-N(4)  | 80.95(7)   | C(5)-C(6)-H(6)      | 119.8    |
| C(3)-O(1)-Re(1)  | 118.86(14) | C(7)-C(6)-H(6)      | 119.8    |
| N(3)-N(1)-C(1)   | 110.52(19) | O(1M)-C(1M)-H(1M1)  | 109.5    |
| N(3)-N(1)-Re(1)  | 134.98(15) | O(1M)-C(1M)-H(1M2)  | 109.5    |
| C(1)-N(1)-Re(1)  | 114.50(15) | H(1M1)-C(1M)-H(1M2) | 109.5    |
| N(1)-C(1)-C(2)   | 107.6(2)   | O(1M)-C(1M)-H(1M3)  | 109.5    |
| N(1)-C(1)-C(3)   | 117.1(2)   | H(1M1)-C(1M)-H(1M3) | 109.5    |
| C(2)-C(1)-C(3)   | 135.3(2)   | H(1M2)-C(1M)-H(1M3) | 109.5    |
| C(2)-N(2)-N(3)   | 112.5(2)   | C(6)-C(7)-C(8)      | 120.5(3) |
| C(2)-N(2)-C(4)   | 127.8(2)   | C(6)-C(7)-H(7)      | 119.8    |
| N(3)-N(2)-C(4)   | 119.67(19) | C(8)-C(7)-H(7)      | 119.8    |
| N(2)-C(2)-C(1)   | 104.3(2)   | C(9)-C(8)-C(7)      | 119.4(3) |
| N(2)-C(2)-H(2)   | 127.8      | C(9)-C(8)-H(8)      | 120.3    |
| C(1)-C(2)-H(2)   | 127.8      | C(7)-C(8)-H(8)      | 120.3    |
| N(1)-N(3)-N(2)   | 104.96(18) | C(8)-C(9)-C(10)     | 120.3(3) |
| O(2)-C(3)-O(1)   | 126.0(2)   | C(8)-C(9)-H(9)      | 119.9    |
| O(2)-C(3)-C(1)   | 119.8(2)   | C(10)-C(9)-H(9)     | 119.9    |
| O(1)-C(3)-C(1)   | 114.17(19) | C(5)-C(10)-C(9)     | 120.2(3) |
| C(15)-N(4)-C(11) | 116.27(19) | C(5)-C(10)-H(10)    | 119.9    |
| C(15)-N(4)-Re(1) | 122.15(15) | C(9)-C(10)-H(10)    | 119.9    |
| C(11)-N(4)-Re(1) | 121.06(15) | N(4)-C(11)-C(12)    | 123.9(2) |
| N(2)-C(4)-C(5)   | 110.80(19) | N(4)-C(11)-H(11)    | 118.0    |
| N(2)-C(4)-H(4A)  | 109.5      | C(12)-C(11)-H(11)   | 118.0    |
| C(5)-C(4)-H(4A)  | 109.5      | C(11)-C(12)-C(13)   | 120.2(2) |
| N(2)-C(4)-H(4B)  | 109.5      | C(11)-C(12)-H(12)   | 119.9    |
| C(5)-C(4)-H(4B)  | 109.5      | C(13)-C(12)-H(12)   | 119.9    |
| H(4A)-C(4)-H(4B) | 108.1      | N(5)-C(13)-C(12)    | 122.2(2) |
| C(13)-N(5)-C(17) | 120.1(2)   | N(5)-C(13)-C(14)    | 122.5(2) |
| C(13)-N(5)-C(16) | 121.0(2)   | C(12)-C(13)-C(14)   | 115.3(2) |
| C(17)-N(5)-C(16) | 118.8(2)   | C(15)-C(14)-C(13)   | 120.7(2) |
| C(6)-C(5)-C(10)  | 119.2(2)   | C(15)-C(14)-H(14)   | 119.6    |

|                     |          |                     |          |
|---------------------|----------|---------------------|----------|
| C(13)-C(14)-H(14)   | 119.6    | N(5)-C(17)-H(17A)   | 109.5    |
| N(4)-C(15)-C(14)    | 123.6(2) | N(5)-C(17)-H(17B)   | 109.5    |
| N(4)-C(15)-H(15)    | 118.2    | H(17A)-C(17)-H(17B) | 109.5    |
| C(14)-C(15)-H(15)   | 118.2    | N(5)-C(17)-H(17C)   | 109.5    |
| N(5)-C(16)-H(16A)   | 109.5    | H(17A)-C(17)-H(17C) | 109.5    |
| N(5)-C(16)-H(16B)   | 109.5    | H(17B)-C(17)-H(17C) | 109.5    |
| H(16A)-C(16)-H(16B) | 109.5    | O(3)-C(18)-Re(1)    | 177.5(2) |
| N(5)-C(16)-H(16C)   | 109.5    | O(4)-C(19)-Re(1)    | 178.3(2) |
| H(16A)-C(16)-H(16C) | 109.5    | O(5)-C(20)-Re(1)    | 177.9(2) |
| H(16B)-C(16)-H(16C) | 109.5    |                     |          |

---

Symmetry transformations used to generate equivalent atoms:
